# Supplementary material for: Gastrointestinal tract mechanism of nitrite capture modeled on the self assembled monolayer of thioproline for electrochemical nitrite determination
Source: Royal Society of Chemistry journal article supplement (doi:10.1039/c6ta10183f), 2017-01-01
Supplement: c6ta10183f1.pdf [file c6ta10183f1.pdf]

## Supporting Information

### Gastrointestinal Tract mechanism of nitrite capture modelled on the Self Assembled Monolayer of Thioproline for electrochemical Nitrite Determination.

Nimisha Singh<sup>1#</sup>, Khushbu Patel<sup>1#</sup>, Suban K Sahoo<sup>1</sup>, Ranjan K Pati<sup>2</sup> and Rajender Kumar<sup>1\*</sup>

# Contribution of Nimisha Singh and Khushbu Patel is major and equal.

<sup>1\*</sup>Department of Applied Chemistry, S.V. National Institute of Technology Surat-395007 Gujarat, India.

<sup>2</sup>Department of Solar Energy Pandit Deendayal Petroleum University, Gandhinagar, Gujarat India.

\* Corresponding Author: E.mail: [rajenderkumar@chem.svnit.ac.in](mailto:rajenderkumar@chem.svnit.ac.in) ( RK); Ph(O)-+91-261-2201655

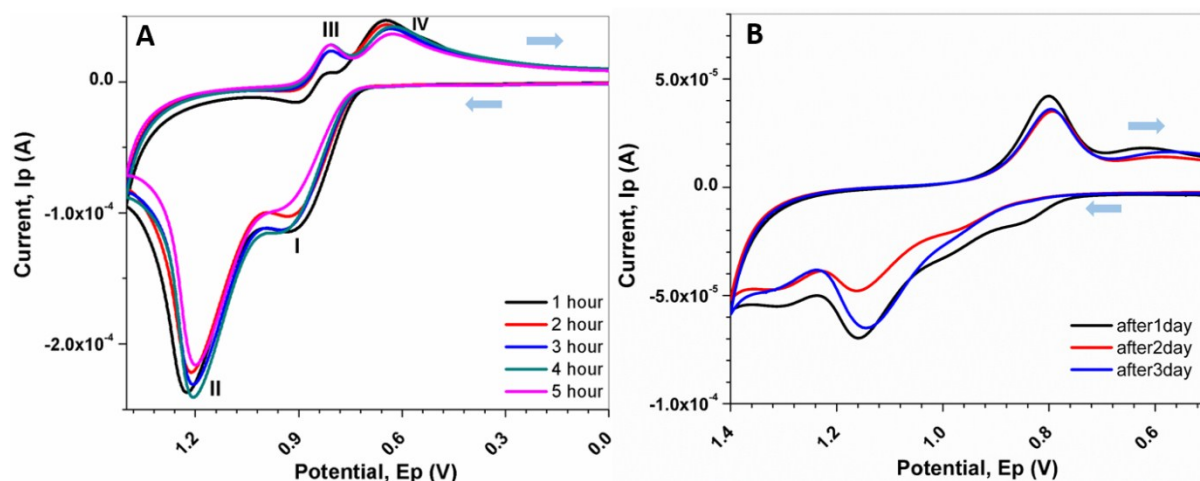

**Figure S1.** Cyclic voltammogram showing effect of time on the nitrite ion stability (A) intraday and (B) inter day cyclic voltammetry analysis.

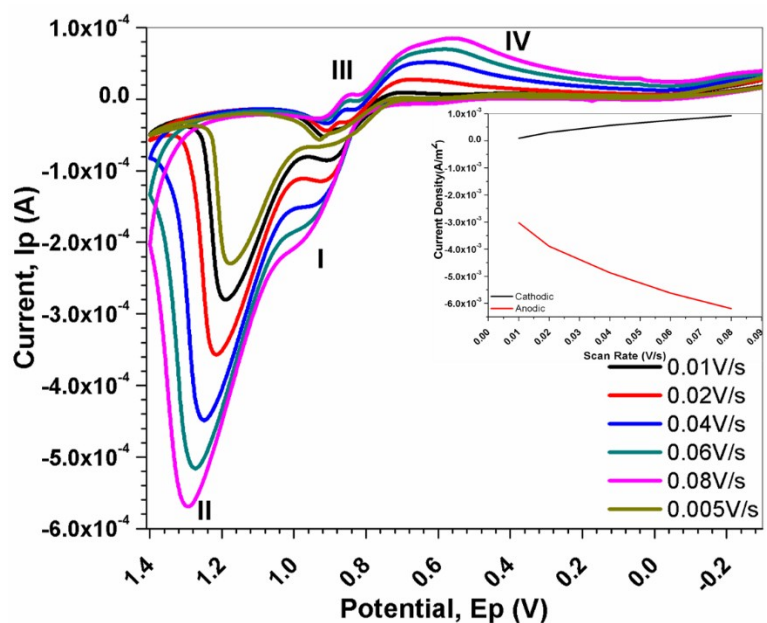

**Figure S2.** Effect of scan rate on the cyclic voltammograms of THP-SAMs upon addition of  $\text{NO}_2^-$  (2mM, pH 2.5, HCl); **Inset:** Current Density vs. Scan rate graph for the cyclic voltammogram of  $\text{NO}_2^-$  on THP-SAMs coated gold electrode.

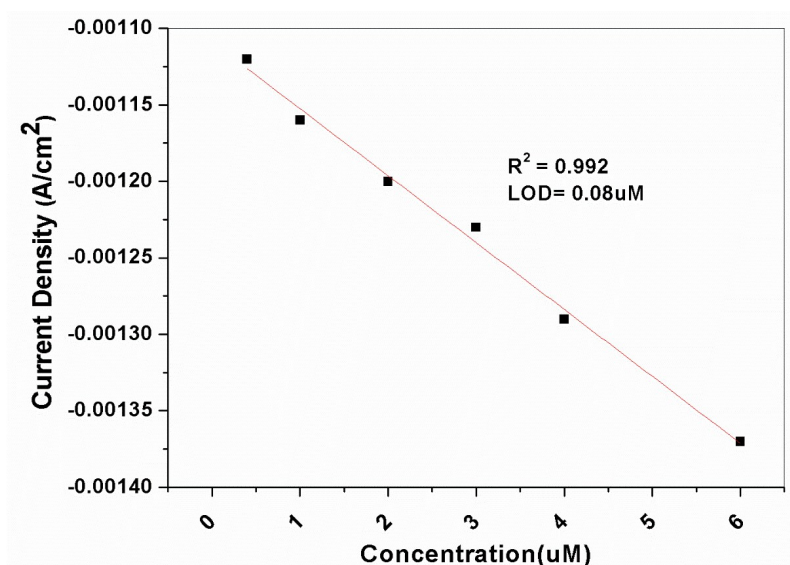

**Figure S3:** Voltammetric curve (Current Density vs.  $\text{NO}_2^-$  Concentration) for determination of  $\text{NO}_2^-$  on THP-SAMs coated gold electrode by cyclic voltammetry at pH 2.5.

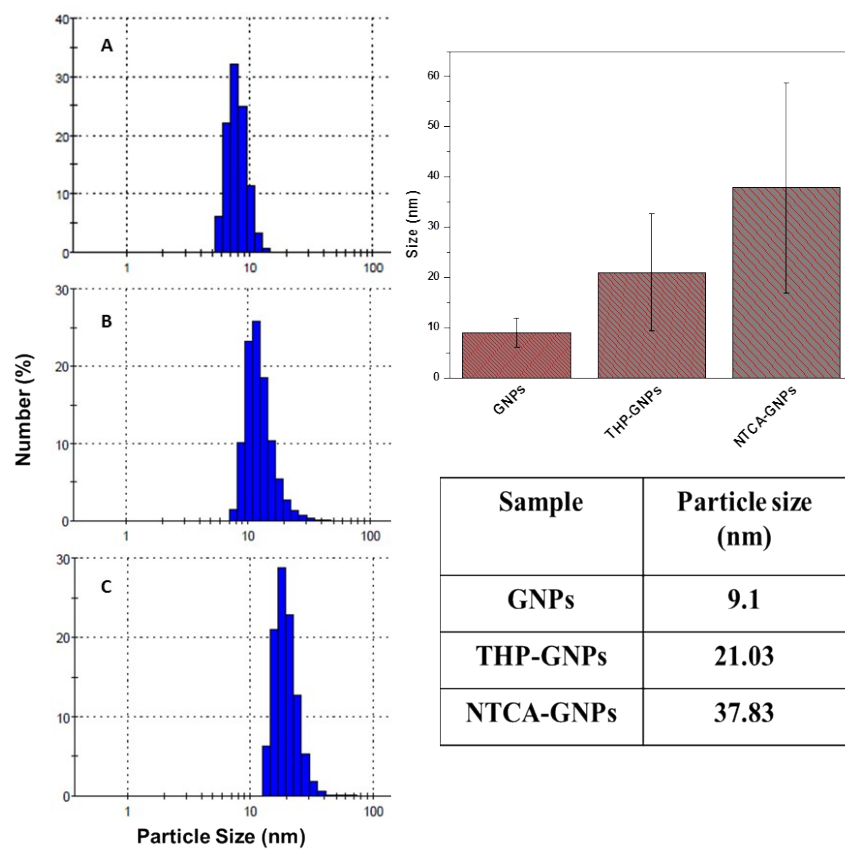

**Figure S4:** DLS measurements and average particle size of (A) GNPs (B) THP-GNPs and (C) NTCA-GNPs.
